# Supplementary material for: Improvement of nano-particulate CexZr1−xO2composite oxides supported cobalt oxide catalysts for CO preferential oxidation in H2-rich gases
Source: Royal Society of Chemistry journal article supplement (doi:10.1039/c1cy00280e), 2011-12-05

## Electronic Supplementary Information

### Improvement of nano-particulate $Ce_xZr_{1-x}O_2$ composite oxides supported cobalt oxide catalysts for CO preferential oxidation in $H_2$ -rich gases

Zhongkui Zhao\*, Xiaoli Lin, Ronghua Jin, Yitao Dai and Guiru Wang

*State Key Laboratory of Fine Chemicals, Department of Fine Chemicals, School of Chemical Engineering, Dalian University of Technology, 2 Linggong Road, Dalian 116024, China; E-mail: zkzhao@dlut.edu.cn*

**Fig. S1 Gas chromatograph for reaction mixture as reaction being performed at 250 °C**

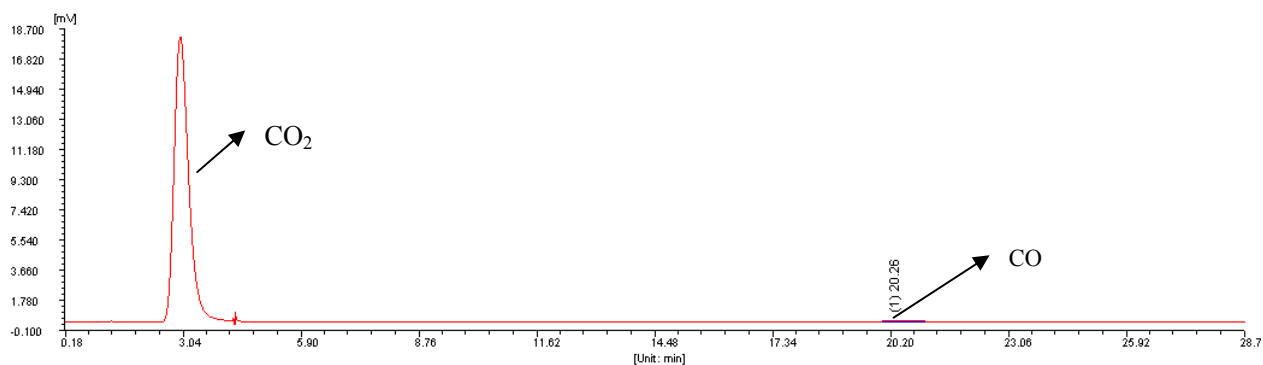

Supplementary Material (ESI) for Catalysis Science & Technology  
This journal is (c) The Royal Society of Chemistry 2011

**Fig. S2 Gas chromatograph for reaction mixture as reaction being performed at 300 °C**

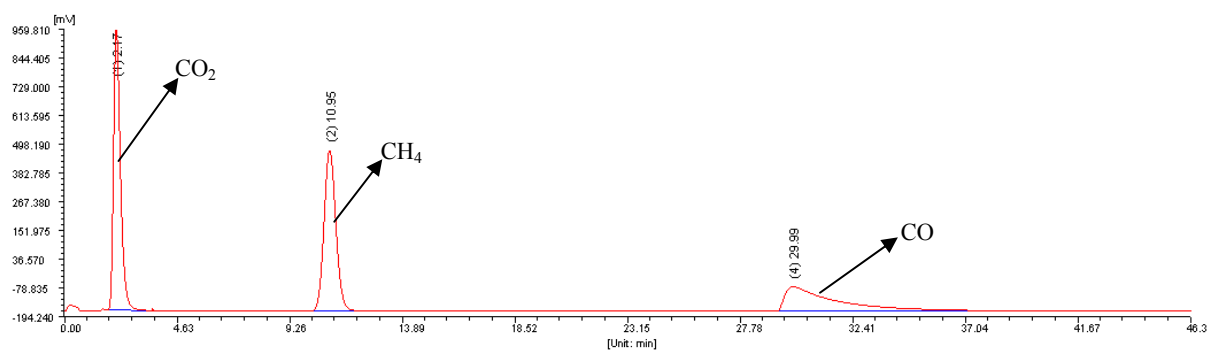

**Table S1**

**The average crystallite size and lattice parameters of  $\text{Co}_3\text{O}_4/\text{RM-Ce}_x\text{Zr}_{1-x}\text{O}_2$  catalysts with various Ce/(Ce+Zr) atomic ratios from X-ray diffraction patterns.**

| Atomic ratio (x) of Ce/(Ce+Zr) | Lattice type              | Lattice parameters (Å) | Average crystallite size (nm) |
|--------------------------------|---------------------------|------------------------|-------------------------------|
| 1 <sup>a</sup>                 | Cubic <i>Fm3m</i>         | a=5.4225               | 6.6                           |
| 1                              | Cubic <i>Fm3m</i>         | a=5.4177               | 7.3                           |
| 0.95                           | Cubic <i>Fm3m</i>         | a=5.4057               | 5.1                           |
| 0.85                           | Cubic <i>Fm3m</i>         | a=5.3961               | 5.1                           |
| 0.80                           | Cubic <i>Fm3m</i>         | a=5.3795               | 4.3                           |
| 0.75                           | Cubic <i>Fm3m</i>         | a=5.3584               | 4.7                           |
| 0.25                           | Tetragonal <i>P42/nmc</i> | a=3.6654<br>c=5.1879   | 5.2                           |

<sup>a</sup> Pure  $\text{CeO}_2$ , without  $\text{Co}_3\text{O}_4$  loading.

**Table S2**

**H<sub>2</sub>-TPR quantitative analysis results for the Co<sub>3</sub>O<sub>4</sub>/RM-Ce<sub>x</sub>Zr<sub>1-x</sub>O<sub>2</sub> catalysts with various Ce/(Ce+Zr) atomic ratios**

| x    | H <sub>2</sub> Uptake (μmol/g) | CeO <sub>2</sub> Content (μmol/g) | Reducible CeO <sub>2</sub> Content (μmol/g) <sup>b</sup> | Reducible CeO <sub>2</sub> (%) <sup>c</sup> |
|------|--------------------------------|-----------------------------------|----------------------------------------------------------|---------------------------------------------|
| 1    | 1218                           | 5709                              | 1838                                                     | 32.2                                        |
| 0.95 | 1294                           | 5502                              | 1992                                                     | 36.2                                        |
| 0.85 | 1573                           | 5070                              | 2550                                                     | 50.3                                        |
| 0.80 | 1635                           | 4843                              | 2673                                                     | 55.2                                        |
| 0.75 | 1675                           | 4610                              | 2752                                                     | 59.7                                        |
| 0.50 | 1687                           | 3329                              | 2776                                                     | 83.4                                        |
| 0.25 | 1107                           | 1815                              | 1615                                                     | 89.0                                        |
| 0    | 400                            | 7984 <sup>a</sup>                 | 200                                                      | 2.5 <sup>d</sup>                            |

<sup>a</sup> ZrO<sub>2</sub> content in ZrO<sub>2</sub> support and Co<sub>3</sub>O<sub>4</sub>/ZrO<sub>2</sub> catalyst; <sup>b</sup> Calculated by 2×[H<sub>2</sub> Uptake-299], where the value 299 μmol.g<sup>-1</sup> is the H<sub>2</sub> uptake for the 1.8 wt% Co<sub>3</sub>O<sub>4</sub> in the catalysts; <sup>c</sup> The reducible CeO<sub>2</sub> percentage in CeO<sub>2</sub> content of catalysts (except for the sample with the pure ZrO<sub>2</sub> as support), which is calculated by [Reducible CeO<sub>2</sub> Content]/[CeO<sub>2</sub> Content of Catalyst]×100%, <sup>d</sup> The reducible ZrO<sub>2</sub> percentage in ZrO<sub>2</sub> amount of support and Co<sub>3</sub>O<sub>4</sub>/ZrO<sub>2</sub> catalyst.

**Fig. S3** Catalytic activity of the RM-Ce<sub>0.85</sub>Zr<sub>0.15</sub>O<sub>2</sub> with (1.8 wt.% of cobalt oxide loading) and without cobalt oxide. Operation conditions: GHSV=15,000 ml.h<sup>-1</sup>.g<sup>-1</sup>, 0.5-1.25 vol.% CO, 1.0 vol.% O<sub>2</sub>, 50 vol.% H<sub>2</sub> and balance Ar.

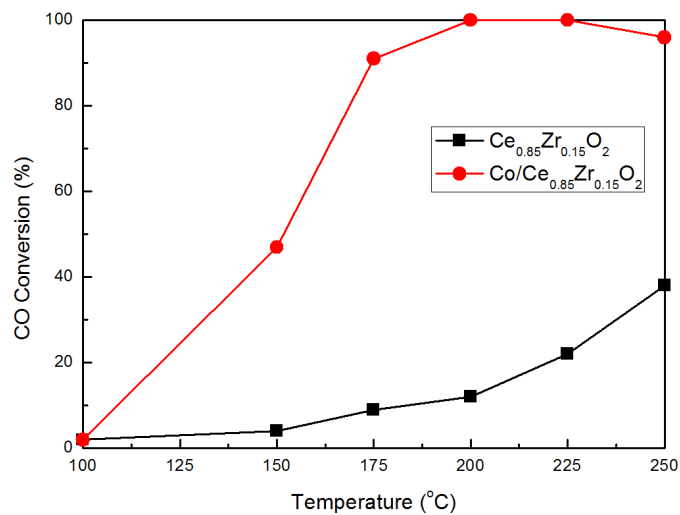

Supplementary Material (ESI) for Catalysis Science & Technology  
This journal is (c) The Royal Society of Chemistry 2011

**Table S3**

**The analysis results for the XRD of  $\text{Co}_3\text{O}_4/\text{Ce}_{0.85}\text{Zr}_{0.15}\text{O}_2$  catalysts with a loading range in 2-27 wt%**

| Catalysts                                      | $\text{Co}_3\text{O}_4$ |                               | CZ           |                       |
|------------------------------------------------|-------------------------|-------------------------------|--------------|-----------------------|
|                                                | Lattice type            | Average crystallite size (nm) | Lattice type | Crystallite size (nm) |
| CZ                                             | -                       | -                             | Fm3m         | 5.5                   |
| 2% $\text{Co}_3\text{O}_4/\text{CZ}(450-450)$  | -                       | -                             | Fm3m         | 5.4                   |
| 4% $\text{Co}_3\text{O}_4/\text{CZ}(450-450)$  | -                       | -                             | Fm3m         | 5.8                   |
| 8% $\text{Co}_3\text{O}_4/\text{CZ}(450-450)$  | Fd3m                    | 13.1                          | Fm3m         | 5.7                   |
| 14% $\text{Co}_3\text{O}_4/\text{CZ}(450-450)$ | Fd3m                    | 14.2                          | Fm3m         | 5.8                   |
| 16% $\text{Co}_3\text{O}_4/\text{CZ}(450-450)$ | Fd3m                    | 14.9                          | Fm3m         | 5.8                   |
| 20% $\text{Co}_3\text{O}_4/\text{CZ}(450-450)$ | Fd3m                    | 15.0                          | Fm3m         | 6.1                   |
| 27% $\text{Co}_3\text{O}_4/\text{CZ}(450-450)$ | Fd3m                    | 16.4                          | Fm3m         | 6.0                   |

**Table S4**

**H<sub>2</sub>-TPR quantitative analysis results for the Co<sub>3</sub>O<sub>4</sub>/Ce<sub>0.85</sub>Zr<sub>0.15</sub>O<sub>2</sub> catalysts with a loading range in 2-27 wt%.**

| Catalysts                                      | H <sub>2</sub> uptake<br>( $\mu\text{mol g}^{-1}$ ) | $\alpha$<br>( $^{\circ}\text{C}$ ) | $\beta$<br>( $^{\circ}\text{C}$ ) | $\gamma$<br>( $^{\circ}\text{C}$ ) | $\delta$<br>( $^{\circ}\text{C}$ ) | H <sub>2</sub> uptake for Co <sub>3</sub> O <sub>4</sub><br>( $\mu\text{mol g}^{-1}$ ) | H <sub>2</sub> uptake for CeO <sub>2</sub><br>( $\mu\text{mol g}^{-1}$ ) |
|------------------------------------------------|-----------------------------------------------------|------------------------------------|-----------------------------------|------------------------------------|------------------------------------|----------------------------------------------------------------------------------------|--------------------------------------------------------------------------|
| 2%Co <sub>3</sub> O <sub>4</sub> /CZ(450-450)  | 1268                                                | 100                                | 261                               | -                                  | 350                                | 332                                                                                    | 936                                                                      |
| 4%Co <sub>3</sub> O <sub>4</sub> /CZ(450-450)  | 1370                                                | 98                                 | 266                               | -                                  | 350                                | 664                                                                                    | 706                                                                      |
| 8%Co <sub>3</sub> O <sub>4</sub> /CZ(450-450)  | 1961                                                | 98                                 | 275                               | 342                                | 357                                | 1328                                                                                   | 633                                                                      |
| 14%Co <sub>3</sub> O <sub>4</sub> /CZ(450-450) | 2921                                                | 99                                 | 285                               | 342                                | 364                                | 2324                                                                                   | 597                                                                      |
| 16%Co <sub>3</sub> O <sub>4</sub> /CZ(450-450) | 3038                                                | 98                                 | 285                               | 337                                | 355                                | 2656                                                                                   | 427                                                                      |
| 20%Co <sub>3</sub> O <sub>4</sub> /CZ(450-450) | 3589                                                | 102                                | 289                               | 334                                | 359                                | 3320                                                                                   | 269                                                                      |
| 27%Co <sub>3</sub> O <sub>4</sub> /CZ(450-450) | 4709                                                | 104                                | 296                               | 340                                | 367                                | 4481                                                                                   | 228                                                                      |

**Fig. S4** H<sub>2</sub> TPR profile of the bare Ce<sub>0.85</sub>Zr<sub>0.15</sub>O<sub>2</sub> support without cobalt loading

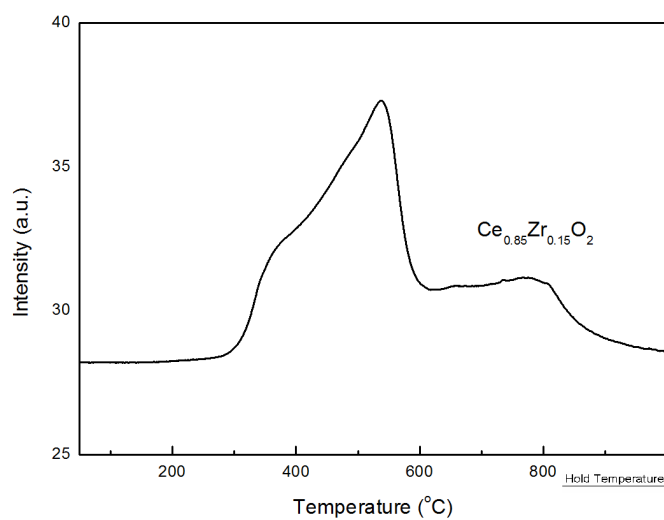

Supplement: c1cy00280e.pdf [file c1cy00280e.pdf]
